# Supplementary material for: Role of Notch, IL-1 and leptin expression in colorectal cancer
Source: PubMed Central journal article supplement — Exp Ther Med. 2021 Apr 11;21(6):600. doi: 10.3892/etm.2021.10032 (PMC8056113; doi:10.3892/etm.2021.10032), 2021-04-11

Figure S1. (A) Tumor staging distribution. One-sample chi-square test was used to determine the difference between T2, T3, and T4 distributions of tumor in patients. In this analysis, the expected frequency for each grade would be 40/3, therefore 13.33 samples in each stage. The P-value obtained as a result of the analysis was  $P < 0.001$ . (B) Tumor pathological type distribution. To detect the difference between the distribution of tubular adenocarcinoma and mucinous carcinoma in the patients, a one-sample chi-square test was applied. In this analysis, the expected frequency for each type would be 40/2, therefore 20 samples per cancer type. The P-value obtained as a result of the analysis was  $P < 0.001$ . (C) Tumor localization distribution. To determine the difference between the right colon, left colon, sigmoid colon, cecum, and rectum tumor localization distributions in the patients, a one-sample chi-square test was applied. The P-value obtained as a result of the analysis was  $P = 0.199$ . Therefore, the tumor localization appeared to be random in the patients included in the present study.

**A**

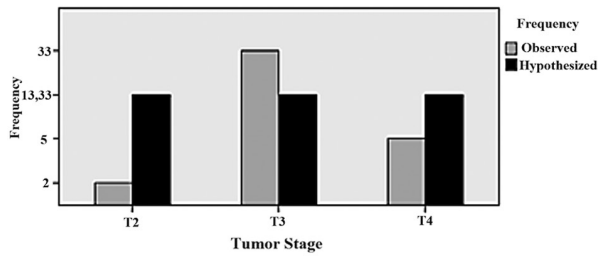

**B**

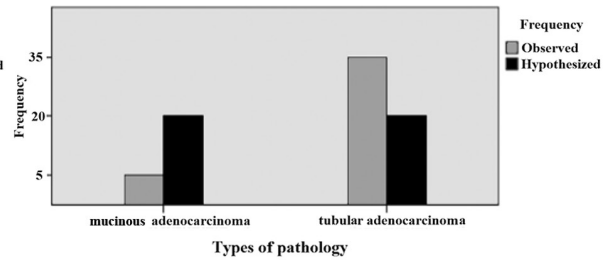

**C**

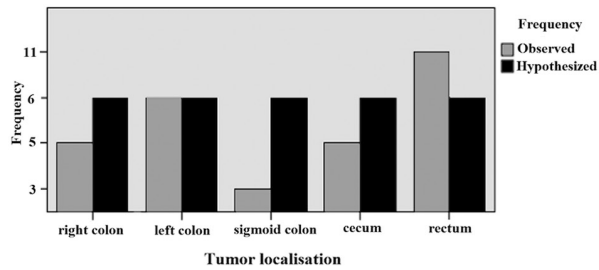

Supplement: Supplementary_Data.pdf [file Supplementary_Data.pdf]
